# Supplementary material for: Performance Evaluation and Online Realization of Data-driven Normalization Methods Used in LC/MS based Untargeted Metabolomics Analysis
Source: PubMed Central journal article supplement (PMC5153651; doi:10.1038/srep38881), 2016-12-13
Supplement: srep38881-s1.pdf [file srep38881-s1.pdf]

**Supplementary Information for:**

**Performance Evaluation and Online Realization of Data-driven Normalization Methods  
Used in LC/MS based Untargeted Metabolomics Analysis**

Bo Li<sup>1,+</sup>, Jing Tang<sup>1,+</sup>, Qingxia Yang<sup>1,+</sup>, Xuejiao Cui<sup>1</sup>, Shuang Li<sup>1</sup>, Sijie Chen<sup>2</sup>, Quanxing Cao<sup>1</sup>, Weiwei Xue<sup>1</sup>, Na  
Chen<sup>1</sup> and Feng Zhu<sup>1,\*</sup>

<sup>1</sup> Innovative Drug Research and Bioinformatics Group, Innovative Drug Research Centre and School of  
Pharmaceutical Sciences, Chongqing University, Chongqing 401331, China

<sup>2</sup> College of Mathematics and Statistics, Chongqing University, Chongqing 401331, China

<sup>+</sup> These authors contribute equally

\* Correspondence: Feng Zhu (zhufeng@cqu.edu.cn)

## Supplementary FIGURES

**Figure S1.** Cluster analysis of 16 normalization methods according to their AUC values (across 10 various sample sizes) calculated based on four benchmark datasets: (a) MTBLS28 ESI+, (b) MTBLS28 ESI-, (c) MTBLS17 ESI+ and (d) MTBLS17 ESI-. The data were presented in matrix format in which columns represent specific training dataset of various sample size and rows represent each normalization method. Each cell in heat map represents AUC value of a normalization method trained on one specific training sample. The cell of the highest AUC value was set as exact blue with those lower AUC values gradually fading towards red (the lowest AUC value). Hierarchical clustering analyses were conducted using *Euclidean* metric and Ward's minimum variance algorithm.

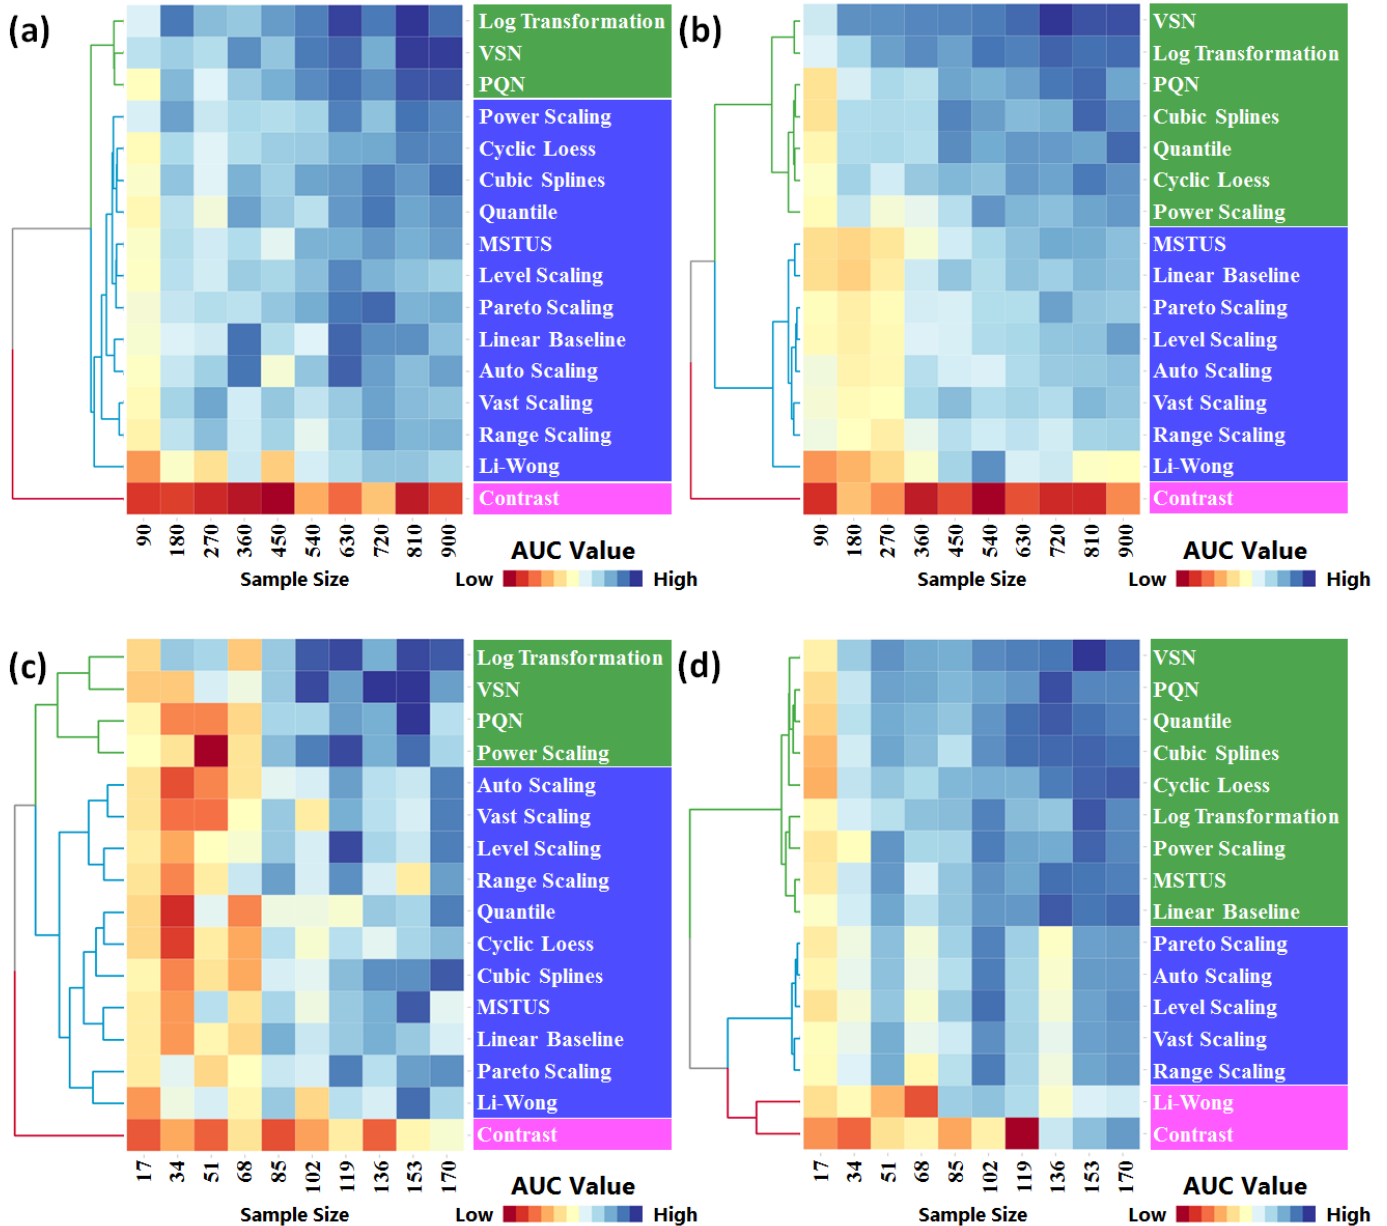

## Supplementary TABLES

**Table S1.** Numbers of selected differential features of each normalization method across 10 sub-datasets based on the benchmark data MTBLS28 (ESI+ and ESI-) and MTBLS17 (ESI+ and ESI-). The differential metabolic features were identified by the VIP value ( $> 1$ ) of S-plots and the p-value ( $< 0.05$ ) of the Student *t*-test.

| Normalization method | MetaboLights ID (ionization mode) | Percentage of data used in the training set for each sub-dataset |     |     |     |     |     |     |     |     |      |
|----------------------|-----------------------------------|------------------------------------------------------------------|-----|-----|-----|-----|-----|-----|-----|-----|------|
|                      |                                   | 10%                                                              | 20% | 30% | 40% | 50% | 60% | 70% | 80% | 90% | 100% |
| Auto Scaling         | MTBLS28 (ESI+)                    | 146                                                              | 304 | 424 | 408 | 471 | 490 | 494 | 500 | 504 | 523  |
|                      | MTBLS28 (ESI-)                    | 84                                                               | 239 | 330 | 294 | 320 | 329 | 353 | 367 | 385 | 382  |
|                      | MTBLS17 (ESI+)                    | 23                                                               | 23  | 37  | 40  | 46  | 122 | 109 | 89  | 155 | 267  |
|                      | MTBLS17 (ESI-)                    | 42                                                               | 58  | 21  | 14  | 22  | 42  | 58  | 68  | 64  | 79   |
| Contrast             | MTBLS28 (ESI+)                    | 48                                                               | 34  | 32  | 45  | 81  | 52  | 72  | 94  | 69  | 139  |
|                      | MTBLS28 (ESI-)                    | 60                                                               | 2   | 64  | 16  | 43  | 37  | 30  | 19  | 31  | 34   |
|                      | MTBLS17 (ESI+)                    | 35                                                               | 5   | 4   | 3   | 5   | 14  | 16  | 12  | 21  | 21   |
|                      | MTBLS17 (ESI-)                    | 26                                                               | 4   | 4   | 7   | 4   | 5   | 10  | 13  | 21  | 24   |
| Cubic Splines        | MTBLS28 (ESI+)                    | 168                                                              | 333 | 434 | 449 | 501 | 522 | 499 | 522 | 515 | 540  |
|                      | MTBLS28 (ESI-)                    | 120                                                              | 206 | 319 | 321 | 348 | 356 | 370 | 395 | 388 | 386  |
|                      | MTBLS17 (ESI+)                    | 30                                                               | 51  | 31  | 59  | 62  | 142 | 118 | 127 | 200 | 215  |
|                      | MTBLS17 (ESI-)                    | 68                                                               | 72  | 62  | 66  | 59  | 74  | 86  | 61  | 112 | 120  |
| Cyclic Loess         | MTBLS28 (ESI+)                    | 149                                                              | 310 | 413 | 424 | 466 | 496 | 476 | 503 | 501 | 517  |
|                      | MTBLS28 (ESI-)                    | 108                                                              | 182 | 300 | 306 | 337 | 352 | 353 | 398 | 402 | 382  |
|                      | MTBLS17 (ESI+)                    | 32                                                               | 64  | 45  | 66  | 77  | 144 | 142 | 144 | 213 | 245  |
|                      | MTBLS17 (ESI-)                    | 59                                                               | 66  | 42  | 32  | 31  | 54  | 47  | 63  | 94  | 87   |
| Level Scaling        | MTBLS28 (ESI+)                    | 146                                                              | 304 | 424 | 408 | 471 | 490 | 494 | 500 | 504 | 523  |
|                      | MTBLS28 (ESI-)                    | 84                                                               | 239 | 330 | 294 | 320 | 329 | 353 | 367 | 385 | 382  |
|                      | MTBLS17 (ESI+)                    | 23                                                               | 23  | 37  | 40  | 46  | 122 | 109 | 89  | 155 | 267  |
|                      | MTBLS17 (ESI-)                    | 42                                                               | 58  | 21  | 14  | 22  | 42  | 58  | 68  | 64  | 79   |
| Li-Wong              | MTBLS28 (ESI+)                    | 157                                                              | 258 | 355 | 314 | 383 | 420 | 416 | 477 | 399 | 489  |
|                      | MTBLS28 (ESI-)                    | 58                                                               | 154 | 284 | 144 | 189 | 203 | 227 | 248 | 241 | 244  |
|                      | MTBLS17 (ESI+)                    | 17                                                               | 24  | 38  | 28  | 55  | 108 | 90  | 38  | 95  | 215  |
|                      | MTBLS17 (ESI-)                    | 27                                                               | 25  | 2   | 3   | 4   | 18  | 21  | 40  | 44  | 49   |
| Linear Baseline      | MTBLS28 (ESI+)                    | 133                                                              | 298 | 423 | 422 | 503 | 505 | 511 | 521 | 510 | 543  |
|                      | MTBLS28 (ESI-)                    | 79                                                               | 203 | 293 | 288 | 288 | 326 | 355 | 367 | 377 | 356  |
|                      | MTBLS17 (ESI+)                    | 32                                                               | 35  | 14  | 41  | 52  | 111 | 103 | 110 | 187 | 199  |
|                      | MTBLS17 (ESI-)                    | 41                                                               | 67  | 46  | 43  | 31  | 62  | 67  | 51  | 102 | 100  |

|                    |                |     |     |     |     |     |     |     |     |     |     |
|--------------------|----------------|-----|-----|-----|-----|-----|-----|-----|-----|-----|-----|
| Log Transformation | MTBLS28 (ESI+) | 227 | 356 | 451 | 445 | 499 | 534 | 533 | 548 | 517 | 550 |
|                    | MTBLS28 (ESI-) | 137 | 291 | 358 | 316 | 333 | 351 | 332 | 366 | 391 | 376 |
|                    | MTBLS17 (ESI+) | 59  | 8   | 4   | 17  | 27  | 32  | 55  | 60  | 79  | 101 |
|                    | MTBLS17 (ESI-) | 91  | 101 | 61  | 54  | 63  | 95  | 90  | 96  | 127 | 136 |
| MSTUS              | MTBLS28 (ESI+) | 133 | 298 | 423 | 422 | 503 | 505 | 511 | 521 | 510 | 543 |
|                    | MTBLS28 (ESI-) | 79  | 203 | 293 | 288 | 288 | 326 | 355 | 367 | 377 | 356 |
|                    | MTBLS17 (ESI+) | 32  | 35  | 14  | 41  | 52  | 111 | 103 | 110 | 187 | 199 |
|                    | MTBLS17 (ESI-) | 41  | 67  | 46  | 43  | 31  | 62  | 67  | 51  | 102 | 100 |
| Pareto Scaling     | MTBLS28 (ESI+) | 146 | 304 | 424 | 408 | 471 | 490 | 494 | 500 | 504 | 523 |
|                    | MTBLS28 (ESI-) | 84  | 239 | 330 | 294 | 320 | 329 | 353 | 367 | 385 | 382 |
|                    | MTBLS17 (ESI+) | 23  | 23  | 37  | 40  | 46  | 122 | 109 | 89  | 155 | 267 |
|                    | MTBLS17 (ESI-) | 42  | 58  | 21  | 14  | 22  | 42  | 58  | 68  | 64  | 79  |
| Power Scaling      | MTBLS28 (ESI+) | 196 | 375 | 581 | 563 | 610 | 635 | 630 | 604 | 617 | 608 |
|                    | MTBLS28 (ESI-) | 118 | 335 | 484 | 457 | 458 | 451 | 464 | 458 | 476 | 469 |
|                    | MTBLS17 (ESI+) | 42  | 21  | 17  | 37  | 41  | 85  | 89  | 79  | 147 | 215 |
|                    | MTBLS17 (ESI-) | 67  | 91  | 29  | 21  | 37  | 71  | 87  | 130 | 135 | 154 |
| PQN                | MTBLS28 (ESI+) | 154 | 311 | 472 | 479 | 550 | 559 | 558 | 547 | 521 | 529 |
|                    | MTBLS28 (ESI-) | 112 | 196 | 338 | 323 | 373 | 391 | 390 | 425 | 412 | 393 |
|                    | MTBLS17 (ESI+) | 27  | 54  | 23  | 63  | 61  | 112 | 125 | 123 | 191 | 210 |
|                    | MTBLS17 (ESI-) | 48  | 71  | 43  | 29  | 39  | 71  | 58  | 56  | 109 | 108 |
| Quantile           | MTBLS28 (ESI+) | 158 | 315 | 420 | 442 | 484 | 510 | 496 | 506 | 501 | 533 |
|                    | MTBLS28 (ESI-) | 120 | 198 | 320 | 315 | 344 | 353 | 359 | 389 | 390 | 385 |
|                    | MTBLS17 (ESI+) | 33  | 50  | 31  | 59  | 65  | 146 | 124 | 127 | 200 | 217 |
|                    | MTBLS17 (ESI-) | 68  | 68  | 55  | 60  | 63  | 75  | 76  | 63  | 115 | 115 |
| Range Scaling      | MTBLS28 (ESI+) | 146 | 304 | 424 | 408 | 471 | 490 | 494 | 500 | 504 | 523 |
|                    | MTBLS28 (ESI-) | 84  | 239 | 330 | 294 | 320 | 329 | 353 | 367 | 385 | 382 |
|                    | MTBLS17 (ESI+) | 23  | 23  | 37  | 40  | 46  | 122 | 109 | 89  | 155 | 267 |
|                    | MTBLS17 (ESI-) | 42  | 58  | 21  | 14  | 22  | 42  | 58  | 68  | 64  | 79  |
| Vast Scaling       | MTBLS28 (ESI+) | 146 | 304 | 424 | 408 | 471 | 490 | 494 | 500 | 504 | 523 |
|                    | MTBLS28 (ESI-) | 84  | 230 | 323 | 267 | 288 | 320 | 335 | 352 | 371 | 366 |
|                    | MTBLS17 (ESI+) | 23  | 23  | 37  | 38  | 41  | 121 | 108 | 86  | 148 | 236 |
|                    | MTBLS17 (ESI-) | 42  | 55  | 21  | 14  | 22  | 40  | 49  | 73  | 60  | 74  |
| VSN                | MTBLS28 (ESI+) | 178 | 362 | 464 | 504 | 521 | 544 | 529 | 552 | 530 | 561 |
|                    | MTBLS28 (ESI-) | 156 | 251 | 365 | 338 | 391 | 383 | 404 | 413 | 427 | 422 |
|                    | MTBLS17 (ESI+) | 55  | 59  | 45  | 58  | 76  | 143 | 122 | 158 | 234 | 248 |
|                    | MTBLS17 (ESI-) | 50  | 74  | 62  | 51  | 58  | 81  | 76  | 65  | 132 | 129 |

**Table S2.** The number of identified features of spiked-in compound with respect to the total number of selected metabolic features from the benchmark dataset MTBLS59 (ESI+) based on each normalization method. The differential features were identified by the VIP value ( $> 1$ ) of S-plots in this study, which is the same as the method used in Franceschi's work (*J. Chemometrics*. 2012, 26:16-24). Gr. 1, Gr. 2 and Gr. 3 here refer to three groups with spiked-in compounds of different concentrations.

|                   |                    | Number of identified spiked-in compounds / number of selected features |          |          |
|-------------------|--------------------|------------------------------------------------------------------------|----------|----------|
|                   |                    | Gr. 1                                                                  | Gr. 2    | Gr. 3    |
| Franceschi's work |                    | 18 / 479                                                               | 16 / 503 | 17 / 450 |
| This study        | Auto Scaling       | 18 / 479                                                               | 16 / 503 | 17 / 450 |
|                   | Contrast           | 14 / 250                                                               | 6 / 244  | 9 / 390  |
|                   | Cubic Splines      | 18 / 498                                                               | 16 / 509 | 17 / 462 |
|                   | Cyclic Loess       | 18 / 494                                                               | 16 / 504 | 17 / 453 |
|                   | Level Scaling      | 18 / 479                                                               | 16 / 503 | 17 / 450 |
|                   | Li-Wong            | 18 / 464                                                               | 16 / 456 | 18 / 420 |
|                   | Linear Baseline    | 18 / 500                                                               | 16 / 510 | 17 / 448 |
|                   | Log Transformation | 18 / 481                                                               | 17 / 502 | 17 / 445 |
|                   | MSTUS              | 18 / 500                                                               | 16 / 510 | 17 / 448 |
|                   | Pareto Scaling     | 18 / 479                                                               | 16 / 503 | 17 / 450 |
|                   | Power Scaling      | 18 / 480                                                               | 16 / 498 | 17 / 441 |
|                   | PQN                | 18 / 494                                                               | 16 / 511 | 17 / 461 |
|                   | Quantile           | 11 / 500                                                               | 6 / 510  | 7 / 465  |
|                   | Range Scaling      | 18 / 479                                                               | 16 / 503 | 17 / 450 |
|                   | Vast Scaling       | 18 / 479                                                               | 16 / 503 | 17 / 450 |
| VSN               | 18 / 489           | 17 / 504                                                               | 17 / 455 |          |



**Table S4.** Performance evaluation of 16 normalization methods across 10 sub-datasets based on the benchmark data MTBLS17 (ESI+ and ESI-). The performance was evaluated by the prediction accuracies (ACCs) on the validation set. The ACC equals to (true positive + true negative) / (true positive + false positive + true negative + false negative).

| Normalization method | MetaboLights ID (ionization mode) | Sample size of 10 various sub-datasets used in the training set |        |        |        |        |        |        |        |        |        |
|----------------------|-----------------------------------|-----------------------------------------------------------------|--------|--------|--------|--------|--------|--------|--------|--------|--------|
|                      |                                   | 17                                                              | 34     | 51     | 68     | 85     | 102    | 119    | 136    | 153    | 170    |
| Auto Scaling         | MTBLS17 (ESI+)                    | 0.7895                                                          | 0.6842 | 0.6842 | 0.7368 | 0.7895 | 0.7895 | 0.7895 | 0.7368 | 0.7368 | 0.7895 |
|                      | MTBLS17 (ESI-)                    | 0.5778                                                          | 0.5778 | 0.6667 | 0.6889 | 0.6889 | 0.7556 | 0.6667 | 0.6889 | 0.6889 | 0.6889 |
| Contrast             | MTBLS17 (ESI+)                    | 0.6316                                                          | 0.6842 | 0.6842 | 0.6842 | 0.6842 | 0.6842 | 0.6842 | 0.6842 | 0.6842 | 0.6842 |
|                      | MTBLS17 (ESI-)                    | 0.5778                                                          | 0.5778 | 0.6444 | 0.6444 | 0.5778 | 0.5778 | 0.5778 | 0.6000 | 0.6889 | 0.5778 |
| Cubic Splines        | MTBLS17 (ESI+)                    | 0.6316                                                          | 0.6316 | 0.6842 | 0.6842 | 0.7368 | 0.7368 | 0.7368 | 0.7368 | 0.7368 | 0.8421 |
|                      | MTBLS17 (ESI-)                    | 0.6000                                                          | 0.6889 | 0.8222 | 0.5778 | 0.6889 | 0.8444 | 0.8222 | 0.8000 | 0.8000 | 0.8000 |
| Cyclic Loess         | MTBLS17 (ESI+)                    | 0.6316                                                          | 0.6316 | 0.6842 | 0.6842 | 0.6842 | 0.6842 | 0.6316 | 0.6316 | 0.6316 | 0.7368 |
|                      | MTBLS17 (ESI-)                    | 0.5778                                                          | 0.6444 | 0.7778 | 0.6889 | 0.7778 | 0.8000 | 0.7556 | 0.7556 | 0.7111 | 0.7556 |
| Level Scaling        | MTBLS17 (ESI+)                    | 0.7895                                                          | 0.6842 | 0.7368 | 0.7368 | 0.7895 | 0.7895 | 0.7895 | 0.7895 | 0.7368 | 0.7895 |
|                      | MTBLS17 (ESI-)                    | 0.5333                                                          | 0.6444 | 0.7111 | 0.6889 | 0.7111 | 0.7111 | 0.6889 | 0.6667 | 0.6889 | 0.6889 |
| Li-Wong              | MTBLS17 (ESI+)                    | 0.7895                                                          | 0.6842 | 0.7368 | 0.7368 | 0.7895 | 0.7895 | 0.7895 | 0.7895 | 0.7368 | 0.7895 |
|                      | MTBLS17 (ESI-)                    | 0.5333                                                          | 0.6444 | 0.7111 | 0.6889 | 0.7111 | 0.7111 | 0.6889 | 0.6667 | 0.6889 | 0.6889 |
| Linear Baseline      | MTBLS17 (ESI+)                    | 0.7368                                                          | 0.6842 | 0.7368 | 0.6842 | 0.7895 | 0.7895 | 0.7895 | 0.7895 | 0.7895 | 0.7895 |
|                      | MTBLS17 (ESI-)                    | 0.5556                                                          | 0.5778 | 0.6444 | 0.5778 | 0.7111 | 0.7111 | 0.6667 | 0.6000 | 0.6667 | 0.6667 |
| Log Transformation   | MTBLS17 (ESI+)                    | 0.6316                                                          | 0.6316 | 0.6842 | 0.6316 | 0.7895 | 0.7368 | 0.7368 | 0.6316 | 0.7368 | 0.6842 |
|                      | MTBLS17 (ESI-)                    | 0.6222                                                          | 0.7111 | 0.7778 | 0.7333 | 0.8000 | 0.8000 | 0.8222 | 0.8889 | 0.7111 | 0.8000 |
| MSTUS                | MTBLS17 (ESI+)                    | 0.6316                                                          | 0.6842 | 0.6842 | 0.6842 | 0.8947 | 0.7895 | 0.8421 | 0.7368 | 0.8421 | 0.7895 |
|                      | MTBLS17 (ESI-)                    | 0.6444                                                          | 0.6667 | 0.6889 | 0.6000 | 0.7556 | 0.8222 | 0.8000 | 0.6889 | 0.7778 | 0.6444 |
| Pareto Scaling       | MTBLS17 (ESI+)                    | 0.6316                                                          | 0.6316 | 0.7368 | 0.6316 | 0.7895 | 0.7368 | 0.7368 | 0.6316 | 0.7895 | 0.7368 |
|                      | MTBLS17 (ESI-)                    | 0.6222                                                          | 0.7111 | 0.8000 | 0.7333 | 0.7556 | 0.8000 | 0.8222 | 0.8222 | 0.6889 | 0.7333 |
| Power Scaling        | MTBLS17 (ESI+)                    | 0.6316                                                          | 0.6842 | 0.6842 | 0.7895 | 0.7895 | 0.7895 | 0.7895 | 0.7368 | 0.7895 | 0.7895 |
|                      | MTBLS17 (ESI-)                    | 0.5333                                                          | 0.5778 | 0.6667 | 0.6889 | 0.7111 | 0.7778 | 0.7111 | 0.6667 | 0.6889 | 0.6889 |
| PQN                  | MTBLS17 (ESI+)                    | 0.6842                                                          | 0.7368 | 0.5789 | 0.6842 | 0.7895 | 0.7895 | 0.8421 | 0.6842 | 0.8421 | 0.7368 |
|                      | MTBLS17 (ESI-)                    | 0.5556                                                          | 0.6667 | 0.7111 | 0.6889 | 0.7111 | 0.7556 | 0.7556 | 0.6667 | 0.6667 | 0.7333 |

|               |                |        |        |        |        |        |        |        |        |        |        |
|---------------|----------------|--------|--------|--------|--------|--------|--------|--------|--------|--------|--------|
| Quantile      | MTBLS17 (ESI+) | 0.5789 | 0.5263 | 0.6316 | 0.6842 | 0.6842 | 0.7368 | 0.7895 | 0.6842 | 0.7895 | 0.6842 |
|               | MTBLS17 (ESI-) | 0.6222 | 0.7333 | 0.7556 | 0.6889 | 0.7333 | 0.8444 | 0.8222 | 0.8667 | 0.7333 | 0.7111 |
| Range Scaling | MTBLS17 (ESI+) | 0.6316 | 0.6316 | 0.6842 | 0.6842 | 0.7368 | 0.6842 | 0.6842 | 0.5789 | 0.6842 | 0.7368 |
|               | MTBLS17 (ESI-) | 0.6000 | 0.7333 | 0.8222 | 0.5778 | 0.7333 | 0.8667 | 0.7556 | 0.7556 | 0.8000 | 0.7778 |
| Vast Scaling  | MTBLS17 (ESI+) | 0.7368 | 0.7895 | 0.6842 | 0.6842 | 0.7895 | 0.7895 | 0.7895 | 0.6842 | 0.6842 | 0.7895 |
|               | MTBLS17 (ESI-) | 0.5778 | 0.6222 | 0.7333 | 0.6667 | 0.7111 | 0.7333 | 0.6889 | 0.6889 | 0.7111 | 0.6889 |
| VSN           | MTBLS17 (ESI+) | 0.7895 | 0.7368 | 0.6842 | 0.7368 | 0.7895 | 0.7895 | 0.7368 | 0.7895 | 0.6842 | 0.7368 |
|               | MTBLS17 (ESI-) | 0.5778 | 0.6222 | 0.7556 | 0.6444 | 0.7111 | 0.7778 | 0.7111 | 0.6667 | 0.7111 | 0.6889 |



**Table S5.** The area under the curve values (AUC) of each normalization method across 10 sub-datasets based on the benchmark data MTBLS28 (ESI+ and ESI-) and MTBLS17 (ESI+ and ESI-).

| Normalization method | MetaboLights ID (ionization mode) | Percentage of data used in the training set for each sub-dataset |        |        |        |        |        |        |        |        |        |
|----------------------|-----------------------------------|------------------------------------------------------------------|--------|--------|--------|--------|--------|--------|--------|--------|--------|
|                      |                                   | 10%                                                              | 20%    | 30%    | 40%    | 50%    | 60%    | 70%    | 80%    | 90%    | 100%   |
| Auto Scaling         | MTBLS28 (ESI+)                    | 0.6928                                                           | 0.7407 | 0.7645 | 0.8237 | 0.7029 | 0.7721 | 0.8341 | 0.7991 | 0.7786 | 0.7975 |
|                      | MTBLS28 (ESI-)                    | 0.6618                                                           | 0.6296 | 0.6353 | 0.7093 | 0.6876 | 0.6836 | 0.7134 | 0.7283 | 0.7303 | 0.7367 |
|                      | MTBLS17 (ESI+)                    | 0.5513                                                           | 0.4359 | 0.4744 | 0.5513 | 0.6282 | 0.6410 | 0.7308 | 0.6667 | 0.6538 | 0.7564 |
|                      | MTBLS17 (ESI-)                    | 0.6721                                                           | 0.7368 | 0.8441 | 0.7267 | 0.7996 | 0.9211 | 0.8178 | 0.7045 | 0.8907 | 0.8927 |
| Contrast             | MTBLS28 (ESI+)                    | 0.5602                                                           | 0.5644 | 0.5499 | 0.5362 | 0.5240 | 0.6232 | 0.5880 | 0.6389 | 0.5401 | 0.5670 |
|                      | MTBLS28 (ESI-)                    | 0.4968                                                           | 0.5849 | 0.5545 | 0.4803 | 0.5141 | 0.4622 | 0.5167 | 0.4915 | 0.4911 | 0.5503 |
|                      | MTBLS17 (ESI+)                    | 0.4423                                                           | 0.5000 | 0.4487 | 0.5513 | 0.4359 | 0.4936 | 0.5641 | 0.4487 | 0.5769 | 0.6026 |
|                      | MTBLS17 (ESI-)                    | 0.5425                                                           | 0.5000 | 0.6336 | 0.6680 | 0.5628 | 0.6640 | 0.3887 | 0.7773 | 0.8462 | 0.8897 |
| Cubic Splines        | MTBLS28 (ESI+)                    | 0.6965                                                           | 0.7733 | 0.7230 | 0.7862 | 0.7633 | 0.7955 | 0.8015 | 0.8180 | 0.8031 | 0.8261 |
|                      | MTBLS28 (ESI-)                    | 0.6107                                                           | 0.7126 | 0.7146 | 0.7130 | 0.7788 | 0.7621 | 0.7419 | 0.7496 | 0.7975 | 0.7754 |
|                      | MTBLS17 (ESI+)                    | 0.5769                                                           | 0.4744 | 0.5513 | 0.5000 | 0.6410 | 0.6282 | 0.7051 | 0.7436 | 0.7436 | 0.7821 |
|                      | MTBLS17 (ESI-)                    | 0.5830                                                           | 0.7672 | 0.8785 | 0.8502 | 0.7915 | 0.9028 | 0.9372 | 0.9433 | 0.9474 | 0.9352 |
| Cyclic Loess         | MTBLS28 (ESI+)                    | 0.6860                                                           | 0.7560 | 0.7234 | 0.7524 | 0.7665 | 0.7689 | 0.7911 | 0.7931 | 0.8156 | 0.8132 |
|                      | MTBLS28 (ESI-)                    | 0.6477                                                           | 0.7224 | 0.6904 | 0.7301 | 0.7436 | 0.7359 | 0.7653 | 0.7581 | 0.7858 | 0.7689 |
|                      | MTBLS17 (ESI+)                    | 0.5385                                                           | 0.4231 | 0.5641 | 0.5000 | 0.6667 | 0.6026 | 0.6667 | 0.6282 | 0.6795 | 0.7051 |
|                      | MTBLS17 (ESI-)                    | 0.5709                                                           | 0.7874 | 0.8381 | 0.8097 | 0.8563 | 0.8664 | 0.8644 | 0.9231 | 0.9474 | 0.9575 |
| Level Scaling        | MTBLS28 (ESI+)                    | 0.6934                                                           | 0.7496 | 0.7331 | 0.7673 | 0.7589 | 0.7774 | 0.8136 | 0.7854 | 0.7746 | 0.7645 |
|                      | MTBLS28 (ESI-)                    | 0.6381                                                           | 0.6264 | 0.6365 | 0.6824 | 0.6856 | 0.7130 | 0.7174 | 0.7329 | 0.7351 | 0.7629 |
|                      | MTBLS17 (ESI+)                    | 0.5641                                                           | 0.5000 | 0.5897 | 0.6026 | 0.6923 | 0.6410 | 0.7949 | 0.6795 | 0.6538 | 0.7564 |
|                      | MTBLS17 (ESI-)                    | 0.6356                                                           | 0.7126 | 0.8360 | 0.7085 | 0.8340 | 0.9372 | 0.8178 | 0.7146 | 0.8826 | 0.9008 |
| Li-Wong              | MTBLS28 (ESI+)                    | 0.6115                                                           | 0.6961 | 0.6590 | 0.7379 | 0.6445 | 0.7309 | 0.7524 | 0.7729 | 0.7729 | 0.7589 |
|                      | MTBLS28 (ESI-)                    | 0.5564                                                           | 0.5753 | 0.6039 | 0.6514 | 0.7204 | 0.7717 | 0.6854 | 0.6940 | 0.6467 | 0.6433 |
|                      | MTBLS17 (ESI+)                    | 0.4872                                                           | 0.6154 | 0.6410 | 0.5769 | 0.6923 | 0.5385 | 0.6667 | 0.6410 | 0.7692 | 0.6795 |
|                      | MTBLS17 (ESI-)                    | 0.6296                                                           | 0.6802 | 0.5810 | 0.4798 | 0.8259 | 0.8421 | 0.8057 | 0.7024 | 0.7551 | 0.7692 |
| Linear Baseline      | MTBLS28 (ESI+)                    | 0.7007                                                           | 0.7258 | 0.7351 | 0.8257 | 0.7520 | 0.7246 | 0.8323 | 0.8076 | 0.8084 | 0.7762 |
|                      | MTBLS28 (ESI-)                    | 0.6067                                                           | 0.5954 | 0.6246 | 0.6930 | 0.7323 | 0.7107 | 0.7363 | 0.7242 | 0.7444 | 0.7383 |
|                      | MTBLS17 (ESI+)                    | 0.5641                                                           | 0.4872 | 0.5769 | 0.5385 | 0.7179 | 0.6538 | 0.6923 | 0.7179 | 0.6923 | 0.6410 |
|                      | MTBLS17 (ESI-)                    | 0.6984                                                           | 0.7652 | 0.8775 | 0.7935 | 0.8381 | 0.8947 | 0.8927 | 0.9575 | 0.9291 | 0.9413 |
| Log Transformation   | MTBLS28 (ESI+)                    | 0.7264                                                           | 0.8217 | 0.7790 | 0.7705 | 0.8007 | 0.8176 | 0.8510 | 0.8209 | 0.8575 | 0.8281 |
|                      | MTBLS28 (ESI-)                    | 0.6810                                                           | 0.7166 | 0.7609 | 0.7746 | 0.7601 | 0.7882 | 0.7810 | 0.7995 | 0.7915 | 0.7947 |
|                      | MTBLS17 (ESI+)                    | 0.5385                                                           | 0.6923 | 0.6795 | 0.5256 | 0.6923 | 0.7821 | 0.7949 | 0.7179 | 0.7949 | 0.7821 |

|                |                |        |        |        |        |        |        |        |        |        |        |
|----------------|----------------|--------|--------|--------|--------|--------|--------|--------|--------|--------|--------|
|                | MTBLS17 (ESI-) | 0.6781 | 0.7632 | 0.7976 | 0.8441 | 0.8502 | 0.9170 | 0.8502 | 0.8360 | 0.9615 | 0.9089 |
| MSTUS          | MTBLS28 (ESI+) | 0.6963 | 0.7520 | 0.7337 | 0.7536 | 0.7202 | 0.7862 | 0.7882 | 0.8031 | 0.7882 | 0.8007 |
|                | MTBLS28 (ESI-) | 0.6067 | 0.6002 | 0.6151 | 0.6566 | 0.6904 | 0.7166 | 0.7359 | 0.7540 | 0.7516 | 0.7379 |
|                | MTBLS17 (ESI+) | 0.5641 | 0.4872 | 0.6667 | 0.5513 | 0.6795 | 0.6154 | 0.6923 | 0.7179 | 0.7821 | 0.6282 |
|                | MTBLS17 (ESI-) | 0.6518 | 0.7753 | 0.8927 | 0.7591 | 0.8381 | 0.8988 | 0.8765 | 0.9372 | 0.9291 | 0.9190 |
| Pareto Scaling | MTBLS28 (ESI+) | 0.7033 | 0.7415 | 0.7528 | 0.7468 | 0.7717 | 0.7899 | 0.8221 | 0.8309 | 0.7858 | 0.7919 |
|                | MTBLS28 (ESI-) | 0.6409 | 0.6256 | 0.6397 | 0.6884 | 0.6860 | 0.7114 | 0.7114 | 0.7605 | 0.7323 | 0.7287 |
|                | MTBLS17 (ESI+) | 0.5641 | 0.6282 | 0.5385 | 0.5897 | 0.6538 | 0.6410 | 0.7564 | 0.6667 | 0.7308 | 0.7436 |
|                | MTBLS17 (ESI-) | 0.6538 | 0.7247 | 0.8462 | 0.7166 | 0.8219 | 0.9170 | 0.8239 | 0.6964 | 0.8846 | 0.8907 |
| Power Scaling  | MTBLS28 (ESI+) | 0.7287 | 0.7975 | 0.7395 | 0.7572 | 0.7528 | 0.7609 | 0.8166 | 0.7750 | 0.8245 | 0.8132 |
|                | MTBLS28 (ESI-) | 0.6401 | 0.7009 | 0.6578 | 0.6727 | 0.7089 | 0.7677 | 0.7452 | 0.7379 | 0.7576 | 0.7657 |
|                | MTBLS17 (ESI+) | 0.5897 | 0.5513 | 0.3718 | 0.5513 | 0.7051 | 0.7564 | 0.7949 | 0.7179 | 0.7692 | 0.6795 |
|                | MTBLS17 (ESI-) | 0.6417 | 0.6883 | 0.8968 | 0.8138 | 0.8158 | 0.9211 | 0.8785 | 0.8725 | 0.9474 | 0.9109 |
| PQN            | MTBLS28 (ESI+) | 0.6900 | 0.7818 | 0.7246 | 0.7689 | 0.7882 | 0.8108 | 0.8269 | 0.8092 | 0.8406 | 0.8414 |
|                | MTBLS28 (ESI-) | 0.6107 | 0.6864 | 0.7162 | 0.7081 | 0.7579 | 0.7488 | 0.7605 | 0.7866 | 0.7951 | 0.7572 |
|                | MTBLS17 (ESI+) | 0.5769 | 0.4744 | 0.4744 | 0.5385 | 0.6795 | 0.6795 | 0.7308 | 0.7179 | 0.8077 | 0.6667 |
|                | MTBLS17 (ESI-) | 0.6275 | 0.7814 | 0.8826 | 0.8765 | 0.8563 | 0.8785 | 0.8947 | 0.9676 | 0.9130 | 0.9130 |
| Quantile       | MTBLS28 (ESI+) | 0.6832 | 0.7480 | 0.7069 | 0.7977 | 0.7689 | 0.7484 | 0.8027 | 0.8225 | 0.7947 | 0.8076 |
|                | MTBLS28 (ESI-) | 0.6329 | 0.7138 | 0.7162 | 0.7097 | 0.7738 | 0.7532 | 0.7661 | 0.7645 | 0.7576 | 0.7967 |
|                | MTBLS17 (ESI+) | 0.5385 | 0.4103 | 0.6282 | 0.4744 | 0.6154 | 0.6154 | 0.6026 | 0.6923 | 0.6795 | 0.7564 |
|                | MTBLS17 (ESI-) | 0.6113 | 0.7955 | 0.8725 | 0.8563 | 0.8381 | 0.8968 | 0.9372 | 0.9575 | 0.9352 | 0.9170 |
| Range Scaling  | MTBLS28 (ESI+) | 0.6775 | 0.7460 | 0.7778 | 0.7355 | 0.7617 | 0.7182 | 0.7633 | 0.7981 | 0.7834 | 0.7862 |
|                | MTBLS28 (ESI-) | 0.6647 | 0.6445 | 0.6242 | 0.6707 | 0.7089 | 0.6916 | 0.7045 | 0.6896 | 0.7206 | 0.7238 |
|                | MTBLS17 (ESI+) | 0.5513 | 0.4744 | 0.5641 | 0.6538 | 0.7308 | 0.6410 | 0.7436 | 0.6410 | 0.5641 | 0.7308 |
|                | MTBLS17 (ESI-) | 0.6822 | 0.7530 | 0.8704 | 0.6781 | 0.7976 | 0.9231 | 0.8158 | 0.7227 | 0.8785 | 0.8947 |
| Vast Scaling   | MTBLS28 (ESI+) | 0.6852 | 0.7613 | 0.7943 | 0.7335 | 0.7709 | 0.7440 | 0.7689 | 0.7967 | 0.7798 | 0.7729 |
|                | MTBLS28 (ESI-) | 0.6574 | 0.6381 | 0.6433 | 0.7158 | 0.7399 | 0.7122 | 0.7208 | 0.7118 | 0.7436 | 0.7323 |
|                | MTBLS17 (ESI+) | 0.5513 | 0.4615 | 0.4615 | 0.5897 | 0.6923 | 0.5641 | 0.7179 | 0.6667 | 0.6410 | 0.7564 |
|                | MTBLS17 (ESI-) | 0.6862 | 0.7348 | 0.8704 | 0.7368 | 0.7713 | 0.9028 | 0.8198 | 0.7389 | 0.8846 | 0.8947 |
| VSN            | MTBLS28 (ESI+) | 0.7470 | 0.7653 | 0.7528 | 0.8092 | 0.7721 | 0.8200 | 0.8325 | 0.7903 | 0.8543 | 0.8535 |
|                | MTBLS28 (ESI-) | 0.6940 | 0.7709 | 0.7717 | 0.7774 | 0.7792 | 0.7838 | 0.7955 | 0.8253 | 0.8092 | 0.8104 |
|                | MTBLS17 (ESI+) | 0.5256 | 0.5256 | 0.6410 | 0.6154 | 0.6923 | 0.7949 | 0.7308 | 0.8077 | 0.8077 | 0.7308 |
|                | MTBLS17 (ESI-) | 0.6640 | 0.8279 | 0.8988 | 0.8745 | 0.8684 | 0.9089 | 0.9190 | 0.9291 | 0.9919 | 0.9413 |

## Supplementary NOTES

**Note S1.** Description of 16 normalization methods applied in this study

### Auto Scaling (unit variance scaling, UV)

The methods aimed at adjusting the variance of different metabolites include variable scaling and variance stabilization approaches. The simplest of these approaches uses the standard deviation of the data as a scaling factor. This method is called Auto Scaling or unit variance (UV) scaling. The equation used in Auto Scaling was defined as:

$$\tilde{x}_{ij} = \frac{x_{ij} - \bar{x}_i}{s_i} \quad (1)$$

where  $s_i$  represents the standard deviation of bucket $_i$ . The method will result in a fluctuation of the data around zero, thereby adjusting for offsets between high and low intensity features. But measurement errors will also be inflated, and between sample variations due to dilution effects, which in case of urine spectra are caused, for example, by variations in fluid intake will not be corrected.

### Contrast Normalization (Contrast)

Contrast Normalization uses MA-plots and makes the same assumptions as Cyclic Loess. The data matrix uses the alternative matrix:

$$Z = \log(X) \cdot T \quad (2)$$

$$z_{ij} = \sum_{k=1}^J \log(x_{ik}) m_{kj} = [\vec{x}_{sum}, \vec{x}_{cont_1}, \dots, \vec{x}_{cont_{J-1}}] \quad (3)$$

where  $T = (t_{ij})$  is the orthonormal transformation matrix.

Then evaluating contrasts by computing the multi-loess fits  $[\hat{x}_{cont_1}, \dots, \hat{x}_{cont_{J-1}}]$ , using the Euclidean

$$\text{distance } \epsilon = \sqrt{\sum_{j=1}^{J-1} (\hat{x}_{cont_j} - \vec{x}_{cont_j})^2}.$$

Loess  $[\tilde{x}_{sum}, \tilde{x}_{cont_1}, \dots, \tilde{x}_{cont_{J-1}}]$  map smoothly from the contrasts to zero:

$$[\vec{x}_{sum}, \hat{x}_{cont_1}, \dots, \hat{x}_{cont_{J-1}}] \cdot T \mapsto [\vec{x}_{sum}, 0, \dots, 0] \cdot T \quad (4)$$

This expands the idea of MA-plots to several dimensions and converts the data into a set of rows representing orthonormal contrasts. But the use of a log function impedes the handling of negative values and zeros.

## Cubic Splines

Another non-linear baseline method makes use of Cubic Splines. As in quantile normalization the aim is to obtain a similar distribution of feature intensities across spectra. The equation used in Cubic Splines was defined as:

$$x_{target_i} = \frac{1}{J} \sum_{j=1}^J x_{ij} \quad (\text{target array}) \quad (5)$$

Evenly spaced set of N quantiles of the target array and sample j:  $j: (x_{target_n}, x_{jn})_{n=1 \dots N}$

The use of a cubic spline generator for each iteration  $k = 1 \dots K$ :  $c_{jk} = f(x_{target_n}, x_{jn})$  leads to the interpolated spline  $s_j = \frac{1}{K} \sum_{k=1}^K c_{jk}$ . In the n-th interval, the spline of sample j is defined by:

$$s_{jn}(x) = a_{jn_1} + a_{jn_2}(x - x_{target_n}) + a_{jn_3}(x - x_{target_n})^2 + a_{jn_4}(x - x_{target_n})^3 \quad (6)$$

where  $\vec{a}_{jn} = [a_{jn_1}, a_{jn_2}, a_{jn_3}, a_{jn_4}]$ . The normalized intensities are:  $\tilde{x}_{ij} = s_j(x_{ij})$ . Moreover, a set of evenly distributed quantiles is taken from both the target spectrum and the sample spectrum and used to fit a smooth cubic spline.

## Cyclic Locally Weighted Regression (Cyclic Loess)

Cyclic Loess is based on MA-plots, which constitute logged Bland-Altman plots. The equation used in Cyclic Loess was defined as:

$$M_{ij_1j_2} = \log_2(x_{ij_1}) - \log_2(x_{ij_2}) = \log_2\left(\frac{x_{ij_1}}{x_{ij_2}}\right) \quad (7)$$

$$A_{ij_1j_2} = \frac{1}{2} \left( \log_2(x_{ij_1}) + \log_2(x_{ij_2}) \right) = \frac{1}{2} \log_2(x_{ij_1} x_{ij_2}) \quad (8)$$

Normalizing a pair of samples  $j_1$  and  $j_2$ :  $\tilde{x}_{ij_1} = 2^{A_k + \frac{\tilde{M}_k}{2}}$ ,  $\tilde{x}_{ij_2} = 2^{A_k + \frac{\tilde{M}_k}{2}}$ , where  $\tilde{M}_k = M_k - M_{k,fit}$ . Repeat it with all  $\frac{J(J-1)}{2}$  pairs of samples. If more than two spectra need to be normalized, the method is iterated in pairs for all possible combinations. Here, all data points are used.

## Level Scaling

Level Scaling focuses on relative response. The equation used in Vast Scaling was defined as:

$$\tilde{x}_{ij} = \frac{x_{ij} - \bar{x}_i}{\bar{x}_i} \quad (9)$$

It suits for identification of e.g. biomarkers. But it also has a weakness that inflation of the measurement errors.

### Linear Baseline Scaling (Linear Baseline)

Linear Baseline Scaling uses a scaling factor to map linearly from each spectrum to the baseline. It assumes a constant linear relationship between each feature of a given spectrum and the baseline. The equation used in the Linear Baseline was defined as:

$$\tilde{x}_{ij} = \beta_j x_{ij} \quad (10)$$

where  $\beta_j = \frac{\bar{x}_{baseline}}{\bar{x}_j}$ . However, the assumption of a linear correlation between spectra may constitute an oversimplification.

### Log Transformation

Log Transformation is a method for data transformation, and it can be used to make highly skewed distributions less skewed. This can be valuable both for making patterns in the data more interpretable and for helping to meet the assumptions of inferential statistics. The equation used in Log Transformation was defined as:

$$\tilde{x}_{ij} = \log_{10} x_{ij} - \frac{\sum_1^j \log_{10} x_{ij}}{j} \quad (11)$$

**Notes:** The original data were represented by  $X = x_{ij}$ , and the normalized data by  $\tilde{X} = \tilde{x}_{ij}$ . Additionally, the mean is estimated as:

$$\bar{x}_i = \frac{1}{J} \sum_{j=1}^J x_{ij} \quad (12)$$

The standard deviation is estimated as:

$$S_i = \sqrt{\frac{\sum_{j=1}^J (x_{ij} - \bar{x}_i)^2}{J-1}} \quad (13)$$

$\tilde{x}$  and  $\hat{x}$  represent the data after different pretreatment steps.

### MS Total Useful Signal (MSTUS)

MSTUS uses the total intensity of metabolites that are common to all samples assuming that there are similar numbers of metabolites with increased and decreased signals. Its normalization factor was calculated by summing the peak areas for markers common to all samples. As a result, each sample had its own normalization factor based only upon the total intensities of peaks which are also common to all other samples, thus eliminating any bias as a result of xenobiotic intake or random background noise. All peaks

areas within a chromatogram were subsequently divided by the sample MSTUS normalization factor. The equation used in MSTUS was defined as:

$$x_{ij} = \frac{x_{ij}}{\sum_1^J x_{ij}} \quad (14)$$

The  $x_{ij}$  represents the peak intensity of any peak in given chromatogram, and the  $\sum_1^J x_{ij}$  represents the sum peak intensity of all common peaks in the same chromatogram.

### Non-Linear Baseline Normalization (Li-Wong)

A more complex approach is to fit a Non-Linear Baseline Normalization relationship between the spectra that are to be normalized and the baseline as implemented by Li and Wong. It is assumed that features corresponding to unregulated metabolites have similar intensity ranks in two spectra, allowing a reliable determination of a normalization curve. The equation used in Li-Wong is defined as:

$$x_{i,baseline} = x_{i,j,median} \quad (15)$$

where  $\bar{x}_{j,median} = median(x_i, \dots, x_j)$ . Based on the proportion rank difference (PRD), finding a set of rank-invariant features  $k$  between baseline and each sample:  $(x_{k,baseline}, x_{kj})$ . Then calculating piecewise linear running median line based on  $k$   $m_{kj}(x) = m(x_{k,baseline}, x_{kj})$  used as normalization curve  $\tilde{x}_{ij} = m_{kj}(x_{ij})$ . Ideally, the data should align along the diagonal  $y = x$ . As the non-normalized data generally deviates from that, the normalization curve is then fitted to map the data to the diagonal.

### Pareto Scaling

Using the square root of the standard deviation is an alternative used by Pareto Scaling. It is similar to Auto Scaling, but its normalizing effect is less intense, such that the normalized data stays closer to its original values. The equation used in Pareto Scaling was defined as:

$$\tilde{x}_{ij} = \frac{x_{ij} - \bar{x}_i}{\sqrt{s_i}} \quad (16)$$

It is less likely to blow up noisy background and reduces the importance of large fold changes compared to small ones. But very large fold changes may still show a dominating effect.

### Power Scaling

Power Scaling is one of the remedial actions that may help to make data normal. The equation used in Power Scaling was defined as:

$$\tilde{x}_{ij} = \sqrt{x_{ij}} - \frac{\sum_1^j \sqrt{x_{ij}}}{j} \quad (17)$$

## Probabilistic Quotient Normalization (PQN)

PQN assumes that biologically interesting changes in concentration influence only parts of the NMR spectrum, while dilution effects will affect all metabolite signals. The reference spectrum is defined as:

$$x_{ref,i} = \frac{1}{J} \sum_{j=1}^J x_{ij} \quad (18)$$

For each spectrum, the equation used for calculating the quotients of all features each spectrum to the reference spectrum is defined as:

$$q_{ij} = \frac{x_{ij}}{x_{ref,i}} \quad (19)$$

The median of the quotients represents the scaling factor:

$$q_{med,j} = med(q_i)_j \quad (20)$$

The normalized intensities are defined as:

$$\tilde{x} = \frac{x_{ij}}{q_{med,j}} \quad (21)$$

All variables of the test spectrum are divided by the median quotient. But in case of urine spectra, dilution effects are caused, for example, by variations in fluid intake.

## Quantile Normalization (Quantile)

The goal of Quantile Normalization is to achieve the same distribution of feature intensities across all spectra. Similarity of distributions can be visualized in a quantile-quantile plot. The equation used in the Quantile Normalization was defined as:

$$\tilde{x}_{ij} = \frac{1}{J} \sum_{l=1}^J x_{k_l,l} \quad (22)$$

where  $k_l$  such that  $rank(x_{k_l,l}) = rank(x_{ij}), \forall l = 1 \dots J$ . The idea is to bring simply all spectra to an identical distribution of intensities across features (bins). Since different features may display the highest intensity in different samples, this constant average value may be assigned to different features across samples.

## Range Scaling

The equation used in Range Scaling was defined as:

$$\tilde{x}_{ij} = \frac{x_{ij} - \bar{x}_i}{x_{i_{max}} - x_{i_{min}}} \quad (23)$$

In this method, all metabolites become equally important. Scaling is related to biology. But it also has a weakness that inflation of the measurement errors and sensitive to outliers.

### **Variance Stabilization Normalization (VSN)**

VSN transformations are a set of non-linear methods that aim to keep the variance constant over the entire data range. The equation used in VSN was defined as:

$$\tilde{x}_{ij} = \text{arsinh}(a_j + b_j x_{ij}) \quad (24)$$

$$\text{arsinh}(t) = \log(t + \sqrt{t^2 + 1}) \quad (25)$$

where the 2 parameters  $a_j$  and  $b_j$  are determined using a robust maximum likelihood estimator such that the variance is constant. This transformation approaches the logarithm for large values, therefore removing heteroscedasticity. As values approach the lower limit of detection, variance does not decrease any more, but rather stays constant, thus, the coefficient of variation increases.

### **Vast Scaling**

Vast Scaling focuses on the metabolites that show small fluctuations. The equation used in Vast Scaling was defined as:

$$\tilde{x}_{ij} = \frac{(x_{ij} - \bar{x}_i)}{s_i} \cdot \frac{\bar{x}_i}{s_i} \quad (26)$$

This method aims for robustness, and can use prior group knowledge. But it isn't suited for large induced variation without group structure.



**Note S2.** All source codes of programs designed in this study

### Source code of program 1: preprocessing datasets and sampling from local folder

*#-- In the Following, the R code for the normalizations used in the paper is given.*

*#-- The non-normalized data matrix of feature intensities is stored in 'data'.*

*#-- Each row represents a feature, each column a sample.*

*### Step 1: Preprocessing MTBLS28 raw data using xcms package in R.*

```
setwd("/Users/idrb/test")
```

```
library(xcms)
```

```
cdffile <- list.files("./POS", recursive = TRUE, full.names = TRUE)
```

```
xr <- xcmsSet(cdffile)
```

```
xsg <- group(xr, bw = 10, sleep = 1e-04)
```

```
xsr <- retcor(xsg, method = "obiwarp")
```

```
xsg <- group(xsr, bw = 10)
```

```
xsg <- fillPeaks(xsg)
```

```
data <- groupval(xsg, "maxint", "into")
```

```
write.csv(data, file = "mtblst28.csv")
```

*### Step 2: Generating of Benchmark dataset and sub-datasets.*

*### 2.1 - All 1005 samples were divided into training group and independent testing group by random selection, i. e., holdout validation.*

*### In the object of matrix or data frame, the first column and the second column were names of sample and labels of sample, respectively.*

```
library(openxlsx)
```

```
data <- read.csv("mtblst28_label.csv", header = TRUE)
```

```
control_sample <- sample(data[data[, 2] == 0, 1], 36)
```

```
ord_con <- match(control_sample, data[, 1])
```

```
controldata <- data[ord_con, ]
```

```

case_sample <- sample(data[data[, 2] == 1, 1], 69)
ord_case <- match(case_sample, data[, 1])
casedata <- data[ord_case, ]
allvali <- c(ord_con, ord_case)
alltrain_data <- data[-allvali, ]
allvali_data <- data[allvali, ]

## Independent testing group include 105 samples.
write.xlsx(allvali_data, file = "IndependentTest(105samples).xlsx")

## Training group include 900 samples.
write.xlsx(alltrain_data, file = "./train_data/percent100.xlsx")

### 2.2 - Generating the sub-datasets (10 datasets) from the training group using K-means clustering.
dat_con <- alltrain_data[alltrain_data[, 2] == 0, ]
dat_case <- alltrain_data[alltrain_data[, 2] == 1, ]
dat_con <- dat_con[, -(1:2)]
dat_case <- dat_case[, -(1:2)]
con_grad <- seq(0.1, 0.9, 0.1) * 500
case_grad <- seq(0.1, 0.9, 0.1) * 400

## (1) Generating 10%, 20%, 30%, 40%, 50%, 60%, 70%, 80%, 90% of the control in training group,
respectively.
sub_dat_con <- list()
for (i in 1:length(con_grad)) {
  fit_kml <- kmeans(dat_con, center = con_grad[i], iter.max = 10, nstart = 1)
  k <- as.data.frame(fit_kml$cluster)
  data <- cbind(k, rownames(k))
  colnames(data)[2] <- "sample.order"
  ff <- NULL
  for (j in 1:con_grad[i]) {

```

```

specific_cluster <- data[data[, 1] == j, ]
specific_cluster_sample <- specific_cluster[, 2]
hh <- NULL
for (h in 1:length(specific_cluster_sample)) {
  from_g_dis <- dist(rbind(dat_con[which(rownames(dat_con) ==
specific_cluster_sample[h]), ],
  fit_kml$centers[specific_cluster[1, 1], ]),
  method = "euclidean")
  from_g_dis <- as.numeric(from_g_dis)
  hh[h] <- list(from_g_dis)
}
res <- specific_cluster[which.min(hh), ]
result <- as.vector(res[, 2])
ff[j] <- list(result)
}
ll <- match(unlist(ff), rownames(dat_con))
resultdata <- dat_con[ll, ]
sub_dat_con[[i]] <- list(resultdata)
}

```

```
save(sub_dat_con, file = "sub_dat_con.Rdata")
```

## (2) Generating 10%, 20%, 30%, 40%, 50%, 60%, 70%, 80%, 90% of the case in training group, respectively.

```
sub_dat_case <- list()
```

```
for (i in 1:length(case_grad)) {
```

```
  fit_kml <- kmeans(dat_case, center = case_grad[i], iter.max = 10, nstart = 1)
```

```
  k <- as.data.frame(fit_kml$cluster)
```

```
  data <- cbind(k, rownames(k))
```

```
  colnames(data)[2] <- "sample.order"
```

```

ff <- NULL

for (j in 1:case_grad[i]) {
  specific_cluster <- data[data[, 1] == j, ]
  specific_cluster_sample <- specific_cluster[, 2]

  hh <- NULL

  for (h in 1:length(specific_cluster_sample)) {
    from_g_dis <- dist(rbind(dat_case[which(rownames(dat_case) ==
specific_cluster_sample[h]), ], fit_kml$centers[specific_cluster[1, 1], ]),
                      method = "euclidean")

    from_g_dis <- as.numeric(from_g_dis)
    hh[h] <- list(from_g_dis)
  }

  res <- specific_cluster[which.min(hh), ]
  result <- as.vector(res[, 2])
  ff[j] <- list(result)
}

ll <- match(unlist(ff), rownames(dat_case))
resultdata <- dat_case[ll, ]
sub_dat_case[[i]] <- list(resultdata)
}

save(sub_dat_case, file = "sub_dat_case.Rdata")

setwd("./train_data")

for (i in 1:9) {
  sub_data <- rbind(as.data.frame(sub_dat_con[i][[1]]),
                   as.data.frame(sub_dat_case[i][[1]]))

  label <- c(rep(0, con_grad[i]), rep(1, case_grad[i]))

  percentage <- cbind(sub_data, label = label)
}

```



```

#---Second adaption: Subtract 10% Quantile from each sample
subtract <- function(x) {
    t(t(x) - apply(x, 2, quantile, 0.1))
}

contrast.data <- subtract(maffy.data)

return(contrast.data)
}

### ----- Method - 03 -----###
### Cubic Spline Normalization (Cubic Spline).
CUBIC <- function(data) {
    # load package unless it is already loaded
    library(affy)

    spline.data <- normalize.qspline(data, samples = 0.02,
                                     target = apply(data, 1, mean))

    return(spline.data)
}

### ----- Method - 04 -----###
### Cyclic Locally Weighted Regression (Cyclic Loess Normalization).
# load package unless it is already loaded
library(affy)
LOESS <- function(data) {
    loess.data <- normalize.loess(data, subset = 1:nrow(data),
                                  epsilon = 10^-2, maxit = 2,
                                  log.it = FALSE, verbose = TRUE,
                                  span = 0.75, family.loess = "gaussian")

    return(loess.data)
}

```

```
### ----- Method - 05 -----###
```

```
### Level Scaling.
```

```
LEVEL <- function(data) {  
    level.data <- scalingMethods(data, methods = "level")  
    return(level.data)  
}
```

```
### ----- Method - 06 -----###
```

```
### Linear Baseline Normalization (Linear Baseline).
```

```
LINEAR <- function(data) {  
    linear.baseline <- apply(data, 1, median)  
    baseline.mean <- mean(linear.baseline)  
    sample.means <- apply(data, 2, mean)  
    linear.scaling <- baseline.mean/sample.means  
    linear.baseline.data <- t(t(data) * linear.scaling)  
    return(linear.baseline.data)  
}
```

```
### ----- Method - 07 -----###
```

```
### Log Transformation.
```

```
LOGTRAN <- function(data) {  
    tmp_data <- apply(data, 1, function(x) log10(x) - mean(log10(x)))  
    logtran.data <- data.frame(t(tmp_data), check.names = FALSE)  
    return(logtran.data)  
}
```

```
### ----- Method - 08 -----###
```

```
### non-Linear Baseline Normalization (Li-Wong Normalization).
```

```
# load package unless it is already loaded
```

```
library(affy)
```

```

LIWONG <- function(data) {
  ###First step: Find baseline sample
  average.intensity <- apply(data, 2, mean)
  # R has an add way of rounding.
  median.number <- round(ncol(data) / 2 + 0.1)
  # the additional 0.1 ensures that it rounds properly
  ordering <- order(average.intensity)
  median.sample.number <- ordering[median.number]
  median.sample <- data[, median.sample.number]
  ###Apply normalization
  liwong.data <- vector()
  for (i in 1:ncol(data)) {
    liwong.model <- normalize.invariantset(data = data[, i],
                                          ref = median.sample,
                                          prd.td = c(0.003, 0.007))
    # the threshold of the rank-invariant set might need to be adjusted from case to case.
    liwong.sample <- predict(liwong.model$fit, data[, i])
    liwong.data <- cbind(liwong.data, liwong.sample)
  }
  return(liwong.data)
}

```

```

### ----- Method - 09 -----###

```

```

### Pareto Scaling.

```

```

PARETO <- function(data) {
  centered.data <- data - apply(data, 1, mean)
  scaling.pareto <- sqrt(apply(data, 1, sd))
  pareto.data <- centered.data / scaling.pareto
}

```



```

        return(pareto.data)
    }

### ----- Method - 10 -----###

### Power Scaling.

POWER <- function(data) {
    power.data <- scalingMethods(data, methods = "power")
    return(power.data)
}

### ----- Method - 11 -----###

### Probabilistic Quotient Normalization (PQN).

PQN <- function(data) {
    reference <- apply(data, 1, median)
    quotient <- data / reference
    quotient.median <- apply(quotient, 2, median)
    pqn.data <- t(t(data) / quotient.median)
    return(pqn.data)
}

### ----- Method - 12 -----###

### Quantile Normalization (Quantile).

# load package unless it is already loaded
library(affy)

QUANTILE <- function(data) {
    normalize.quantile <- get("normalize.quantiles", en = asNamespace("affy"))
    quantile.data <- normalize.quantile(data)
    return(quantile.data)
}

### ----- Method - 13 -----###

```

### Range Scaling.

```
RANGE <- function(data) {  
  if (!require("DiffCorr") == TRUE)  
    biocLite("DiffCorr")  
  range.data <- scalingMethods(data, methods = "range")  
  return(range.data)  
}
```

### ----- Method - 14 ----- ###

### Variance Stabilization Normalization (VSN).

# load package unless it is already loaded

```
VSN <- function(data) {  
  library(vsn)  
  vsn.model <- vsn2(data)  
  vsn.data <- predict(vsn.model, data)  
  return(vsn.data)  
}
```

### ----- Method - 15 ----- ###

### Vast Scaling.

```
VAST <- function(data) {  
  vast.data <- scalingMethods(data, methods = "vast")  
  return(vast.data)  
}
```

### Source code of program 3: marker selection methods applied in this study

### Defining the approach for marker selection.

### For this method, PLS-DA and Student t-test were jointly used.

#-- input1: mat, a matrix with sample in column and variable in row.

*#-- input2: label with vector attributes.*

```
library(ropls)
```

```
markerSelect <- function(data) {
```

```
  OPLSDA_test <- function(mat, label) {
```

```
    X <- t(mat)
```

```
    Y <- as.factor(label)
```

```
    oplstda <- opl(X, Y, permI = 100)
```

```
    res <- oplstda$vipVn
```

```
    cpds <- data.frame(CompoundName = names(res), VIP = res)
```

```
    return(cpds)
```

```
  }
```

```
  oplstda_res <- OPLSDA_test(data, train_label)
```

```
  rowTTest <- function(x) {
```

```
    s2e <- 1:(length(train_label) * 5 / 9)
```

```
    t_res <- t.test(x[s2e], x[-s2e], paired = FALSE)
```

```
    return(t_res$p.value)
```

```
  }
```

```
  ttest_res <- apply(data, 1, rowTTest)
```

```
  marker_matrix <- data[oplstda_res$VIP > 1 & ttest_res < 0.05, ]
```

```
  return(marker_matrix)
```

```
}
```

**Source code of program 4: marker Selection, construction of SVM model and ROC.**

```
indep_set <- openxlsx::read.xlsx(xlsxFile = "IndependentTest(105samples).xlsx",
```

```
  sheet = 1, startRow = 1, colNames = TRUE,
```

```
  rowNames = TRUE)
```

```
indep_label <- indep_set$Label
```

```

indep_set <- indep_set[, -1]

setwd("./plot")

library(ROCR)

PQN_r <- list()

for (i in 1:10) {

  datao <- openxlsx::read.xlsx(xlsxFile = file[i], sheet = 1, startRow = 1,
                              colNames = TRUE, rowNames = TRUE)

  train_data <- t(datao[, -1])
  train_label <- datao[, 1]

  # save(train_data, file = "train_data.RData")
  # load("train_data.RData")

  PQN_data <- PQN(train_data)
  PQN_indep <- PQN(t(indep_set))
  x4svm <- markerSelect(PQN_data)
  X <- t(x4svm)
  train_label <- as.factor(train_label)
  obj <- tune(svm, X, train_label, ranges = list(gamma = 10^(-5:5),
                                                cost = 2^(0:2)),
             tunecontrol = tune.control(sampling = "cross"))

  # Best gamma.
  best_gm <- obj$best.parameters$gamma
  best_gm

  # Best C-value.
  best_ct <- obj$best.parameters$cost
  best_ct

  PQN_test <- t(PQN_indep[rownames(x4svm), ])
  model <- svm(X, train_label, probability = TRUE, scale = TRUE,

```

```

        kernel = "radial", gamma = best_gm, cost = best_ct, cross = 0)

pre_label <- predict(model, PQN_test, probability = TRUE)

stat_res <- table(pre_label, indep_label)

accuracy <- (stat_res[1, 1] + stat_res[2, 2])/length(pre_label)

sensitivity <- stat_res[2, 2]/(stat_res[1, 2] + stat_res[2, 2])

specificity <- stat_res[1, 1]/(stat_res[1, 1] + stat_res[2, 1])

pre_prob <- attr(pre_label, "probabilities")

par(mfrow = c(1, 1))

pred <- prediction(pre_prob[, 2], indep_label)

perf <- performance(pred, "tpr", "fpr")

auc.tmp <- performance(pred, "auc")

auc.value <- auc.tmp@y.values

AUC <- round(auc.value[[1]], digits = 4)

plot(perf, colorize = TRUE, main = paste("AUC=", round(auc.value[[1]],
                                                    digits = 4) * 100,
                                                    "%", sep = ""))

grid(5, 5, lwd = 1)

lines(c(0, 1), c(0, 1), lty = 2, lwd = 2, col = "red")

tj <- c(dim(X)[2], best_gm, best_ct, accuracy, sensitivity, specificity, AUC)

PQN_r[i] <- list(tj)

}

save(PQN_r, file = "PQN_r.RData")

save(perf, file = "PQN_perf.RData")

setwd("../")

```

**Source code of program 5: assessment by ROC and accuracy.**

*### Step 1: Comparison among the classification performances of 15 normalization methods*

### Measured by the receiver operating characteristic (ROC) curves.

```
library(ROCR)
```

```
setwd("./plot")
```

```
load("AUTO_perf.RData")
```

```
x <- unlist(perf@x.values)
```

```
y <- unlist(perf@y.values)
```

```
lo <- loess(y ~ x)
```

```
plot(x, y, col = "white", xlab = "1-Specificity", ylab = "Sensitivity")
```

```
lines(x, predict(lo), lwd = 3, lty = 1, col = "black")
```

```
load("CUBIC_perf.RData")
```

```
x <- unlist(perf@x.values)
```

```
y <- unlist(perf@y.values)
```

```
lo <- loess(y ~ x)
```

```
lines(x, predict(lo), lwd = 3, col = "darkorchid")
```

```
load("LEVEL_perf.RData")
```

```
x <- unlist(perf@x.values)
```

```
y <- unlist(perf@y.values)
```

```
lo <- loess(y ~ x)
```

```
lines(x, predict(lo), lwd = 3, col = "red")
```

```
load("PARETO_perf.RData")
```

```
x <- unlist(perf@x.values)
```

```
y <- unlist(perf@y.values)
```

```
lo <- loess(y ~ x)
```

```
lines(x, predict(lo), lwd = 3, col = "steelblue1")
```

```
load("POWERperf.Rdata")
```

```
x <- unlist(perf@x.values)
```

```
y <- unlist(perf@y.values)
```

```
lo <- loess(y ~ x)
lines(x, predict(lo), lwd = 3, col = "orange")
load("RANGE_perf.RData")
x <- unlist(perf@x.values)
y <- unlist(perf@y.values)
lo <- loess(y ~ x)
lines(x, predict(lo), lwd = 3, col = "springgreen4")
load("VAST_perf.RData")
x <- unlist(perf@x.values)
y <- unlist(perf@y.values)
lo <- loess(y ~ x)
lines(x, predict(lo), lwd = 3, col = "yellow3")
load("VSNperf.Rdata")
x <- unlist(perf@x.values)
y <- unlist(perf@y.values)
lo <- loess(y ~ x)
lines(x, predict(lo), lwd = 3, col = "mediumblue")
load("LINEARpref.Rdata")
x <- unlist(perf@x.values)
y <- unlist(perf@y.values)
lo <- loess(y ~ x)
lines(x, predict(lo), lwd = 3, col = "red", lty = 2)
load("CONTRASTpref.Rdata")
x <- unlist(perf@x.values)
y <- unlist(perf@y.values)
lo <- loess(y ~ x)
lines(x, predict(lo), lwd = 3, col = "steelblue1", lty = 2)
```

```

load("LIWONGperf.Rdata")
x <- unlist(perf@x.values)
y <- unlist(perf@y.values)
lo <- loess(y ~ x)
lines(x, predict(lo), lwd = 3, col = "springgreen4", lty = 2)

load("loessperf.Rdata")
x <- unlist(perf@x.values)
y <- unlist(perf@y.values)
lo <- loess(y ~ x)
lines(x, predict(lo), lwd = 3, col = "mediumblue", lty = 2)

load("logtranperf.Rdata")
x <- unlist(perf@x.values)
y <- unlist(perf@y.values)
lo <- loess(y ~ x)
lines(x, predict(lo), lwd = 3, col = "yellow3", lty = 2)

load("PQNperf.Rdata")
x <- unlist(perf@x.values)
y <- unlist(perf@y.values)
lo <- loess(y ~ x)
lines(x, predict(lo), lwd = 3, col = "darkorchid", lty = 2)

load("QUANTILEperf.Rdata")
x <- unlist(perf@x.values)
y <- unlist(perf@y.values)
lo <- loess(y ~ x)
lines(x, predict(lo), lwd = 3, col = "orange", lty = 2)
lines(c(0, 1), c(0, 1), lty = 1, lwd = 2, col = "grey83")
legend = c("AUTO(AUC:o.78o6)", "Cubic Spline(AUC:o.78o2)", "LEVEL(AUC:o.8o15)",

```



```
"Pareto(AUC:o.7697)", "Power(AUC:o.7822)", "Range(AUC:o.7307)",  
"VAST(AUC:o.7802)", "VSN(AUC:o.8269)", "Linear Baseline(AUC:o.7576)",  
"Contrast(AUC:o.5076)", "Li-Wong(AUC:o.7568)", "Cyclic Loess(AUC:o.7854)",  
"Log transf(AUC:o.8378)", "PQN(AUC:o.7202)", "Quantile(AUC:o.779)")
```

```
legend("bottomright", legend = legend,  
      col = c("black", "darkorchid", "red", "steelblue1", "orange",  
             "springgreen4", "yellow3", "mediumblue", "red", "steelblue1",  
             "springgreen4", "mediumblue", "yellow3", "darkorchid", "orange"),  
      lwd = 2, lty = c(rep(1, 8), rep(2, 7)),  
      cex = 0.7, seg.len = 2, text.width = 0.28)
```

```
setwd("../")
```

### Step 2: The dependence of classification performance of each normalization method on the sample size

### Reading AUC values matrix of biomarkers identified across 15 different methods in 10 subsamples.

```
library(ROCR)
```

```
AUCs <- read.csv("AUC_matrix", header = FALSE)
```

```
rn <- AUCs[, 1]
```

```
AUCs <- AUCs[, -1]
```

```
rownames(AUCs) <- rn
```

```
cn <- seq(90, 900, by = 90)
```

```
colnames(AUCs) <- cn
```

```
par(mfrow = c(1, 1), bg = "white")
```

```
x <- 1:10
```

```
# Auto Scaling
```

```
y <- unlist(AUCs[1, ])
```

```
lo <- loess(y ~ x)
```

```
plot(x, y, col = "white", xlab = "Sample size",
```

```
      ylab = "AUC values", ylim = c(0.46, 0.91),
```

```
xaxt = "n")
```

```
lines(x, predict(lo), lwd = 3, lty = 1, col = "black")
```

```
# Contrast
```

```
y <- unlist(AUCs[2, ])
```

```
lo <- loess(y ~ x)
```

```
lines(x, predict(lo), lwd = 3, col = "steelblue1", lty = 2)
```

```
# Cubic Splines
```

```
y <- unlist(AUCs[3, ])
```

```
lo <- loess(y ~ x)
```

```
lines(x, predict(lo), lwd = 3, col = "darkorchid")
```

```
# Cyclic Loess
```

```
y <- unlist(AUCs[4, ])
```

```
lo <- loess(y ~ x)
```

```
lines(x, predict(lo), lwd = 3, col = "mediumblue", lty = 2)
```

```
# Level Scaling
```

```
y <- unlist(AUCs[5, ])
```

```
lo <- loess(y ~ x)
```

```
lines(x, predict(lo), lwd = 3, col = "red")
```

```
# Li-Wong
```

```
y <- unlist(AUCs[6, ])
```

```
lo <- loess(y ~ x)
```

```
lines(x, predict(lo), lwd = 3, col = "springgreen4", lty = 2)
```

```
# Linear Baseline
```

```
y <- unlist(AUCs[7, ])
```

```
lo <- loess(y ~ x)
```

```
lines(x, predict(lo), lwd = 3, col = "red", lty = 2)
```

```
# Log Transformation
```

```
y <- unlist(AUCs[8, ])
lo <- loess(y ~ x)
lines(x, predict(lo), lwd = 3, col = "yellow3", lty = 2)

# Pareto Scaling
y <- unlist(AUCs[9, ])
lo <- loess(y ~ x)
lines(x, predict(lo), lwd = 3, col = "steelblue1")

# Power Scaling
y <- unlist(AUCs[10, ])
lo <- loess(y ~ x)
lines(x, predict(lo), lwd = 3, col = "orange")

# PQN
y <- unlist(AUCs[11, ])
lo <- loess(y ~ x)
lines(x, predict(lo), lwd = 3, col = "darkorchid", lty = 2)

# Quantile
y <- unlist(AUCs[12, ])
lo <- loess(y ~ x)
lines(x, predict(lo), lwd = 3, col = "orange", lty = 2)

# Range Scaling
y <- unlist(AUCs[13, ])
lo <- loess(y ~ x)
lines(x, predict(lo), lwd = 3, col = "springgreen4")

# Vast Scaling
y <- unlist(AUCs[14, ])
lo <- loess(y ~ x)
lines(x, predict(lo), lwd = 3, col = "yellow3")
```

```

# VSN
y <- unlist(AUCs[15, ])
lo <- loess(y ~ x)
lines(x, predict(lo), lwd = 3, col = "mediumblue")
axis(1, at = 1:10, c(90, 180, 270, 360, 450, 540, 630, 720, 810, 900))
legend = c("AUTO", "Cubic Spline", "LEVEL", "Pareto", "Power", "Range",
           "VAST", "VSN", "Linear Baseline", "Contrast", "Li-Wong",
           "Cyclic Loess", "Log transf", "PQN", "Quantile")
legend("bottomright", legend = legend,
       col = c("black", "darkorchid", "red", "steelblue1", "orange",
              "springgreen4", "yellow3", "mediumblue", "red", "steelblue1",
              "springgreen4", "mediumblue", "yellow3", "darkorchid", "orange"),
       lwd = 2, lty = c(rep(1, 8), rep(2, 7)),
       cex = 0.55, horiz = FALSE)

```

### Step 3: The identified 4 groups of 15 normalization methods identification in 10 sub-samples.

### Divided into four pictures.

```

op <- par(mfrow=c(2, 2), bg = "white")
x <- 1:10
### (A) Superior performance group
### VSN.
y <- unlist(AUCs[15, ])
lo <- loess(y ~ x)
plot(x, y, col = "white", xlab = "Sample size", ylab = "AUC values",
     ylim = c(0.46, 0.91), xaxt="n",
     main = "A. Superior performance group")
lines(x, predict(lo), lwd = 3, lty = 1, col = "mediumblue")
axis(1, at = 1:10, pasteo(seq(90, 900, by = 90)))

```

### Log Transformation.

```
y <- unlist(AUCs[8, ])
```

```
lo <- loess(y ~ x)
```

```
lines(x, predict(lo), lwd = 3, col = "yellow3", lty = 2)
```

### (B) Consistently good performance group

### Auto Scaling.

```
y <- unlist(AUCs[1, ])
```

```
lo <- loess(y ~ x)
```

```
plot(x, y, col = "white", xlab = "Sample size", ylab = "AUC values",
```

```
      ylim = c(0.46, 0.91), xaxt = "n",
```

```
      main = "B. Consistently good performance group")
```

```
lines(x, predict(lo), lwd = 3, lty=1, col = "black")
```

```
axis(1, at = 1:10, paste0(seq(90, 900, by = 90)))
```

### Cubic Splines.

```
y <- unlist(AUCs[3, ])
```

```
lo <- loess(y ~ x)
```

```
lines(x, predict(lo), lwd = 3, col = "darkorchid", lty = 1)
```

### Level Scaling.

```
y <- unlist(AUCs[5, ])
```

```
lo <- loess(y ~ x)
```

```
lines(x, predict(lo), lwd = 3, col = "red", lty = 1)
```

### Pareo Scaling.

```
y <- unlist(AUCs[9, ])
```

```
lo <- loess(y ~ x)
```

```
lines(x, predict(lo), lwd = 3, col = "steelblue1", lty = 1)
```

### Power Scaling.

```
y <- unlist(AUCs[10, ])
```

```

lo <- loess(y ~ x)

lines(x, predict(lo), lwd = 3, col = "orange", lty = 1)

### Range Scaling.

y <- unlist(AUCs[13, ])

lo <- loess(y ~ x)

lines(x, predict(lo), lwd = 3, col = "springgreen4", lty = 1)

### Vast Scaling.

y <- unlist(AUCs[14, ])

lo <- loess(y ~ x)

lines(x, predict(lo), lwd = 3, col = "yellow3", lty = 1)

### Quantile.

y <- unlist(AUCs[12, ])

lo <- loess(y ~ x)

lines(x, predict(lo), lwd = 3, col = "orange", lty = 2)

### Linear Baseline.

y <- unlist(AUCs[7, ])

lo <- loess(y ~ x)

lines(x, predict(lo), lwd = 3, col = "red", lty = 2)

### Cyclic Loess.

y <- unlist(AUCs[4, ])

lo <- loess(y ~ x)

lines(x, predict(lo), lwd = 3, col = "mediumblue", lty = 2)

### (C) Moderate performance group

### Li-Wong.

y <- unlist(AUCs[6, ])

lo <- loess(y ~ x)

plot(x, y, col = "white", xlab = "Sample size", ylab = "AUC values",

```

```

ylim = c(0.46, 0.91), xaxt = "n",
main = "C. Moderate performance group")
lines(x, predict(lo), lwd = 3, lty = 2, col = "springgreen4")
axis(1, at = 1:10, pasteo(seq(90, 900, by = 90)))
### PQN.
y <- unlist(AUCs[11, ])
lo <- loess(y ~ x)
lines(x, predict(lo), lwd = 3, col = "darkorchid", lty = 2)
### (D) Poor performance group
### Contrast.
y <- unlist(AUCs[2, ])
lo <- loess(y ~ x)
plot(x, y, col = "white", xlab = "Sample size", ylab = "AUC values",
ylim = c(0.46, 0.91), xaxt = "n",
main = "D. Poor performance group")
lines(x, predict(lo), lwd = 3, lty = 2, col = "steelblue1")
axis(1, at = 1:10, pasteo(seq(90, 900, by = 90)))
par(op)

```

### Source code of program 6: investigating relationship among normalizing methods.

```

### Step 1: Heatmap used in presentation of relationship among methods.
### Heatmap used for investigating the relationships among 15 methods.
### For example, the Euclidean distance and ward.D algorithm was selected.
mydist <- function(x) dist(x, method = "euclidean")
myclust <- function(x) hclust(x, method = "ward.D")
library(d3heatmap)
d3heatmap(AUCs, # AUCs refer to the matrix consisting of a series of AUC values.

```

```
distfun = mydist,  
hclustfun = myclust,  
scale="none", colors="RdYlBu", k_row = 4, k_col = 2)
```

### Step 2: Corrplot (correlation coefficient plot) used in presentation of relationship among methods.

```
library(corrplot)  
data <- read.csv("AUC_matrix", header = TRUE)  
sample.data <- data  
rownames(sample.data) <- sample.data[, 1]  
sample.data <- sample.data[, -1]  
op <- par(mfrow = c(1, 1), bg = "white")  
M <- cor(t(sample.data))  
corrplot(M, method = "ellipse", type = "lower", tl.cex = 0.7, tl.col = "black",  
         rect.col = "black", addCoef.col = "black")  
### ----- The end of codes!!! ----- ###
```
